# Supplementary material for: Cardiovascular adverse events in modern myeloma therapy – Incidence and risks. A review from the European Myeloma Network (EMN) and Italian Society of Arterial Hypertension (SIIA)
Source: PubMed Central journal article supplement — Haematologica. 2018 Jul 26;103(9):1422–32. doi: 10.3324/haematol.2018.191288 (PMC6119131; doi:10.3324/haematol.2018.191288), 2018-09
Supplement: HAEMATOL-2018-191288v3-Bringhen-01.pdf [file HAEMATOL-2018-191288v3-Bringhen-01.pdf]

## Cardiovascular disease in multiple myeloma

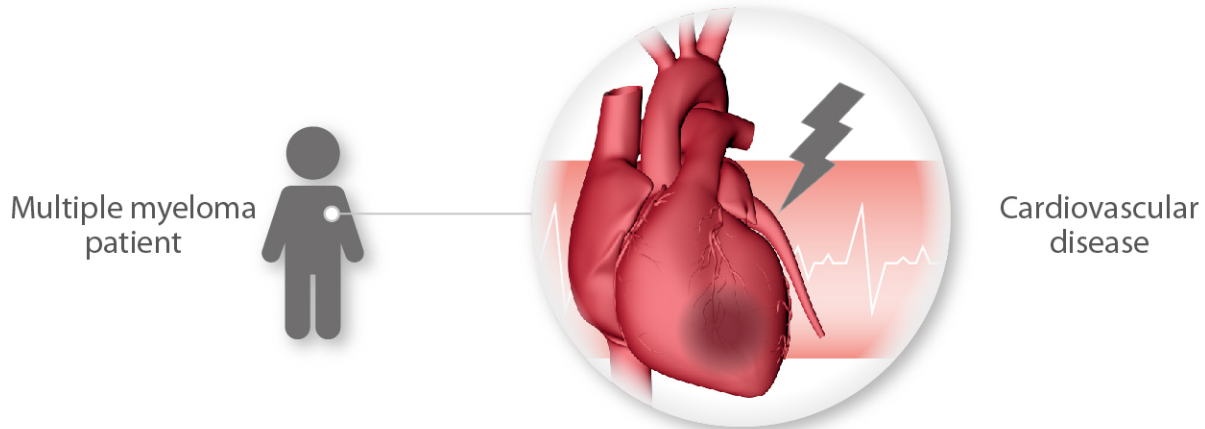

### TRIGGER FACTORS

#### Factors unrelated to the disease

- Age
- Diabetes
- Dyslipidemia
- Obesity
- Prior cardiovascular diseases

#### Factors related to the disease

- Cardiac AL-amyloidosis
- Hyperviscosity
- High-output failure
- Arteriovenous shunting
- Anemia
- Renal dysfunction

#### Factors linked to chemotherapy

- Anthracyclines
- Corticosteroids
- Alkylating agents
- Immunomodulatory drugs
- Proteasome inhibitors

Incidence of cardiovascular disease increases in multiple myeloma (**60.1%**) compared to non-multiple myeloma patients (**54.5%**)
